# Supplementary material
Source: publisher site journal article supplement (https://www.dovepress.com/article/393174)
Supplement: Supplementary file 1 [file get_supplementary_file.php]

| S1 | (MH "Metabolic Syndrome").ti,ab OR “Metabolic syn” or “dysmetabolic syndrome” or MetS or “Metabolic disease” or “Syndrome X” or “Insulin resistance*” or “Nutritional and metabolic disease*” OR “Hypertriglyceridemic waist”.ti,ab |
| --- | --- |
| S2 | (MH "Patient Compliance").ti,ab OR Adherence or Engagement or Compliance or Concordance or Attendance or Committed or Improve* strateg* or “Long term management” or “Non-adheren*” or Absent or “Drop out” or Withdraw* or “No show” or “Not participate” or Refuse or Refusal.ti,ab |
| S3 | (MH "Exercise").ti,ab OR “Exercise therapy” or “Exercise training” or “Physical exercise” or “Physical activity” or EPA or “Physical training” or “Fitness Training” or Sport or “Work out” or Supervised or “planned exercise” or Movement or Exertion or “Muscular exercise” or “leisure time” or Aerobic or “Aerobic exercise” or “Aerobic training” or “Resistance training” or “Weight lifting” or “Strength endurance” or “Strength training” or “Cardiovascular training” or “Cardiovascular exercise program*” or “Cardiorespiratory exercise program*” or “Activities of daily living” or “Functional training” or Endurance or Mobility or Sedentary or “Sedentary behavio*” or “Physical inactivity” or Inactivity.ti,ab |
| S4: S1+S2+S3  +NOT Terms  Limit to English Language  Limit to All Adult 18+ | NOT covid-19 OR coronavirus OR 2019-ncov OR sars-cov-2 OR cov-19 OR osteo* OR osteoarthritis OR "degenerative arthritis" OR "degenerative joint disease" OR cancer OR "breast cancer" OR pregnancy OR pregnant OR prenatal OR antenatal OR perinatal OR maternal OR "brain injury" OR "head injury" OR "traumatic brain injury" OR "acquired brain injury" OR sarcopenia OR sarcopenic OR children OR adolescents OR youth OR child OR teenager OR psychiatry OR psychiatric OR "mental health".ti,ab |

Appendix 1. Example search strategy
